## **Interpreting ruminant specific conserved non-coding elements by developmental gene regulatory network**

Xiangyu Pan<sup>1†</sup>, Zhaoxia Ma<sup>2,3†</sup>, Xinqi Sun<sup>2,3†</sup>, Hui Li<sup>1,4†</sup>, Tingting Zhang<sup>1</sup>, Chen Zhao<sup>1</sup>, Nini Wang<sup>1</sup>, Rasmus Heller<sup>5</sup>, Wing Hung Wong<sup>6</sup>, Wen Wang<sup>7,8,9\*</sup>, Yu Jiang<sup>1\*</sup>, Yong Wang<sup>2,3,9,10\*</sup>

1. Key Laboratory of Animal Genetics, Breeding and Reproduction of Shaanxi Province, College of Animal Science and Technology, Northwest A&F University, Yangling 712100, China

2. CEMS, NCMIS, HCMS, MDIS, Academy of Mathematics and Systems Science, Chinese Academy of Sciences, Beijing 100190, China

3. School of Mathematics, University of Chinese Academy of Sciences, Chinese Academy of Sciences, Beijing, China, Beijing 100049, China

4. State Key Laboratory for Conservation and Utilization of Subtropical Agro-Bioresources, College of Animal Science and Technology, Guangxi University, Nanning, 530005, Guangxi, China

5. Section for Computational and RNA Biology, Department of Biology, University of Copenhagen, DK-2100 Copenhagen, Denmark

6. Department of Statistics, Department of Biomedical Data Science, Bio-X Program, Stanford University, Stanford, CA 94305, USA

7. Center for Ecological and Environmental Sciences, Northwestern Polytechnical University, Xi'an 710072, China

8. State Key Laboratory of Genetic Resources and Evolution, Kunming Institute of Zoology, Chinese Academy of Sciences, Kunming 650223, China

9. Center for Excellence in Animal Evolution and Genetics, Chinese Academy of Sciences, Kunming 650223, China

10. Key Laboratory of Systems Biology, Hangzhou Institute for Advanced Study, University of Chinese Academy of Sciences, Chinese Academy of Sciences, Hangzhou, 330106, China

†These authors contributed equally to this work.

\*Corresponding authors. E-mail: [ywang@amss.ac.cn](mailto:ywang@amss.ac.cn) (Y.W.), [yu.jiang@nwafu.edu.cn](mailto:yu.jiang@nwafu.edu.cn) (Y.J.), [wwang@mail.kiz.ac.cn](mailto:wwang@mail.kiz.ac.cn) (W.W.)

1 **Abstract**

2 **Background:** Biologists long recognized that the genetic information encoded in

3 DNA leads to trait innovation via gene regulatory network (GRN) in development.

4 **Results:** Here, we generated paired expression and chromatin accessibility data

5 during rumen and esophagus development in sheep and revealed 1,601 active

6 ruminant-specific conserved non-coding elements (active-RSCNEs). To interpret the

7 function of these active-RSCNEs, we developed a Conserved Non-coding Element

8 interpretation method by gene Regulatory network (CNEReg) to define toolkit

9 transcription factors (TTF) and model its regulation on rumen specific gene via

10 batteries of active-RSCNEs during development. Our developmental GRN reveals 18

11 TTFs and 313 active-RSCNEs regulating the functional modules of the rumen and

12 identifies OTX1, SOX21, HOXC8, SOX2, TP63, PPARG and 16 active-RSCNEs that

13 functionally distinguish the rumen from the esophagus.

14 **Conclusions:** We argue that CNEReg is an attractive systematic approach to integrate

15 evo-devo concepts with omics data to understand how gene regulation evolves and

16 shapes complex traits.

17

18 **Keywords:** Gene regulatory network, CNE, Toolkit transcription factors, Rumen

## 19 **Background**

20 To answer the key question of how new traits arise during the macro-evolutionary  
21 process, biologists have long realized the necessity to understand the gene regulation  
22 in development responsible for morphological diversity, i.e., which genes are  
23 expressed, what regulatory element changes are involved and how do regulatory  
24 element changes affect development [1]. Only recently has the field of large-scale  
25 omics and the accumulation of data matured sufficiently to explore these theoretical  
26 concepts in detail. Here, we investigate the ruminant multi-chambered stomach, a key  
27 mammalian organ innovation and a cornerstone of evolutionary theory, as an example  
28 to illustrate a novel framework for integrating multi-omics data to address the  
29 fundamental question of organ innovation.

30 The rumen hosts a diverse ecosystem of microorganisms and facilitates efficient  
31 plant fibers digestion and short chain fatty acids uptake, which significantly promoted  
32 the expansion and diversification of ruminant animals by providing a unique  
33 evolutionary advantage relative to non-ruminants [2]. This remarkable morphological  
34 innovation raises the fundamental question of how the genetic toolkit generates  
35 functional complexity through development and evolution [1, 3, 4]. By comparing 51  
36 ruminants with 12 mammalian outgroup species genomes, we previously identified  
37 221,166 ruminant-specific conserved non-coding elements (RSCNEs), which span  
38 about 0.61% of the genome (16.5 Mbp in total) [5]. These RSCNEs are potential  
39 regulatory elements of proximal or distal genes for transcriptional regulation in the  
40 development of morphological and physiological traits [6]. In addition, we previously

41 sequenced two representative ruminants (sheep and roe deer) for gene expression  
42 across 50 tissues. Comparative transcriptome analysis reveals 656 rumen-specific  
43 expressed genes (RSEGs) and hypothesizes that rumen's anatomical predecessor is  
44 the esophagus by their most similar expression profile [5, 7]. It's in pressing need to  
45 understand how the RSCNEs leading to the expression of RSEG changes.

46 One major bottleneck is that the cellular context, target gene and mode of gene  
47 regulation of the RSCNEs are largely unknown. First, the regulatory role of RSCNEs  
48 could be spatio-temporally dynamic and highly context-specific. Second, some  
49 RSCNEs were located distant (e.g., more than 500 kbp) from any genes and therefore  
50 could not be associated with any target genes using standard approaches, such as  
51 GREAT [8]. This problem is emphasized by a recent finding that non-coding region  
52 associating with a human craniofacial disorder causally affects SOX9 expression at a  
53 distance up to 1.45 Mbp during a restricted time window of facial progenitor  
54 development [9]. This example motivated us to develop a framework for RSCNE  
55 functional inference by uncovering GRNs at different developmental times and in  
56 different tissue types, and integrating them with their functional relation to traits.

57 To tackle the above challenges, we generated time series of paired gene  
58 expression and chromatin accessibility data during rumen and esophagus development  
59 in sheep to reconstruct a time series of developmental GRNs. Our previous efforts  
60 showed that jointly modeling multi-omics data allows us to infer high quality tissue  
61 specific regulatory networks [10], which can be used to identify key transcription  
62 factors (TFs) during differentiation [11], reveal causal regulations [12], and interpret

63 functionally important genetic variants [13]. Taken together, we aim to integrate  
64 multi-omics data to a reconstruct genome-wide GRN during different stages of  
65 development in an apomorphic organ. Specifically, this allows us to understand how  
66 transcription factors bind to functional RSCNEs to coordinate cell type specific gene  
67 expression of rumen-specifically expressed genes (RSEGs), and hence to gain further  
68 insights into the evolutionary development of new organs.

69 **Results**

70 **Landscape of accessible chromatin regions and gene expression during rumen**

71 **development**

72 We resolved a high-resolution chromatin accessibility and gene expression landscapes  
73 of rumen development by collecting ruminal epithelial cell, esophageal epithelial cell,  
74 and hepatocyte cell at five stages (embryo 60-day [E60], postnatal day 1 [D1], day 7  
75 [D7], day 28 [D28] and adult 1-year [Y1]) from 14 sheep (Fig. 1A). Our experimental  
76 design covers the major stages of the ruminal epithelium differentiation and  
77 development [14, 15], and ensures an exact matching of tissues used for RNA-seq and  
78 ATAC-seq libraries. In total, 37 ATAC-seq and 34 RNA-seq data sets including  
79 biological and technical replicates showed high quality (Methods; Additional file 1:  
80 Table S1, 2). The ATAC-seq samples have an average of 115 Mbp post-quality control  
81 uniquely mapped fragments to the sheep Oar\_4.0 genome (Additional file 1: Table S1;  
82 Additional file 2: Fig. S1A), which are highly enriched at transcription start sites  
83 (Additional file 2: Fig. S1B) and show a nucleosome structure consistent distribution  
84 (Additional file 2: Fig. S1C). We obtained 178,651 open chromatin regions (OCRs)  
85 across all samples (mean 46,872 peaks per sample) (Additional file 1: Table S1).

86 Hierarchical clustering of gene expression and chromatin accessibility show that  
87 rumen development is a multi-stage biological process (Fig. 1B, 1C). Stages E60 and  
88 D1 cluster in one group and D7, D28, and Y1 cluster in another group by gene  
89 expression. Chromatin accessibility patterns further distinguish stages E60 and D1.  
90 Principal component analysis (PCA) for 14,637 expressed genes and 178,651 OCRs

91 corroborates this multi-stage pattern (Fig. 1D, 1E). Early development stages E60 and  
92 D1 show larger replicate variation than D7, D28, and Y1 at both chromatin  
93 accessibility and gene expression levels (Fig. 1D, 1E). In addition, chromatin  
94 accessibility shows a more smoothed trajectory than gene expression during rumen  
95 development (Fig. 1C).

96 The esophagus shows a very similar multi-stage development (Additional file 2:  
97 Fig. S2A, B). PCA indicates larger variance in developmental stages (PC1 32%) and  
98 smaller variance among tissue types (PC2 25%) (Additional file 2: Fig. S2C, D). This  
99 pattern is consistent with previous studies showing that gene expression divergence  
100 between tissues/cell types increases as development progresses [16]. Importantly, our  
101 chromatin accessibility data mirror this pattern, i.e., the similarity in chromatin  
102 accessibility distribution between the two tissues declines as development progresses.

103

#### 104 **Identification and characterization of active-RSCNEs**

105 We obtained 159,837 reproducible OCRs by intersecting peaks from three replicates  
106 for rumen and esophagus at four developmental stages. The number of reproducible  
107 OCRs was largest in stage E60 (about 40%) and decreased along the developmental  
108 stages (Fig. 2A), which is consistent with the observation of higher amounts of  
109 accessible chromatin in embryonic stage [17]. Most reproducible OCRs were located  
110 at distal intergenic (39.42%), intron (32.61%), and promoter (21.46%) (+/- 3 kbp from  
111 transcription start site) sites (Fig. 2B). After overlapping the OCRs with 221,166  
112 RSCNEs from ruminant comparative genomics analysis [5], we identified 1,601

113 active-RSCNEs with an average length of 82 bp (Additional file 1: Table S3). Again,  
114 the number of active RSCNEs decreases along the development stages both in rumen  
115 and esophagus (Fig. 2C). They are mainly located in distal intergenic (48.95%), intron  
116 (42.4%), and promoter regions (4.96%) (Fig. 2D). Compared to all reproducible  
117 OCRs, active-RSCNEs are less in promoter regions by 15% (Additional file 2: Fig.  
118 S3A), and the esophagus shows a consistent trend (Additional file 2: Fig. S3B). This  
119 suggests active-RSCNEs tend to function as distal element during development. In  
120 addition, our observation that the vast majority of active-RSCNEs are found in early  
121 developmental stages (>90% in E60, D1, D7) emphasizes the importance of early  
122 developmental cellular context for interpreting the regulatory role of CNEs.

123 We next associated the 1,601 active-RSCNEs with their 1,796 genes nearby.  
124 Gene ontology analysis of these genes are enriched in terms, such as “primary  
125 metabolic process”, “catalytic activity”, and “regulation of signaling” (Additional  
126 file 2: Fig. S3C). Moreover, those 1,796 genes are significantly enriched in  
127 transcription factors (TFs) (Additional file 2: Fig. S3D; Fisher’s exact test,  $P$  value =  
128  $4.20 \times 10^{-4}$ ). These 1,796 genes overlap with 656 RSEGs by 85 genes (Fig. 2E;  
129 Fisher’s exact test,  $P$  value =  $5.50 \times 10^{-11}$ ) which are enriched in “cardiac muscle cell  
130 apoptotic process”, “tongue development”, and “keratinization” (Fig. 2F).

131 The 1,601 active-RSCNEs are composed of 414 Type I and 1,187 Type II  
132 RSCNEs (Additional file 1: Table S3; Fig. 2G). Type I have no known orthologs in  
133 non-ruminant outgroups and Type II orthologs exhibit significantly higher substitution  
134 rates among outgroups [5]. The ratio between Type I and Type II active-RSCNEs is



135 ~0.35, which is 5-fold less than that of all RSCNEs, which have a Type I/Type II ratio  
136 ~1.77 (Fig. 2G). This surprising fact suggests that Type II RSCNEs tend to be more  
137 activate in the developmental stage than Type I. Because of the deeper evolutionary  
138 origin of Type II RSCNEs, they are more likely to function by altering existing  
139 regulatory elements. Furthermore, we found that active-RSCNEs are enriched for  
140 binding motifs of transcriptional regulators known to play a vital role in rumen  
141 development (AP-1, PITX1, TP63, KLF, GRHL, TEAD, OTX, and HOX) (128 motifs  
142 with Benjamini  $q$ -value  $< 1.00 \times 10^{-3}$  are listed in Additional file 1: Table S4),  
143 suggesting that some active-RSCNEs may act as rumen developmental enhancers.

144       To assess whether the RSCNEs are likely to play an enhancer role, we next  
145 compared our 1,601 active-RSCNEs with the 523,159 developmental regions of  
146 transposase-accessible chromatin (d-TACs) data sets from mouse [18] and 926,535  
147 human enhancers from ENCODE phase III [19]. About 24% of the active-RSCNEs  
148 can be found in these data sets (Fig. 2H), and 11 active-RSCNEs show *in vivo* reporter  
149 activity according to the VISTA database [20] (Fig. 2H). To validate the potential  
150 regulatory activity, 10 active-RSCNEs of length ~300 bp were randomly selected and  
151 assessed for enhancer activity detection in both sheep and goat fibroblasts *in vitro*.  
152 Nine of them showed significantly higher luciferase transcriptional activation  
153 compared to the pGL3-Promoter control (t-test,  $P$  value  $< 0.05$ ) (Fig. 2I). Collectively,  
154 these results suggest that the active-RSCNEs potentially serves as enhancers in the  
155 process of rumen development and evolution.

156

157 **Conserved Non-coding Element interpretation method by Gene Regulatory**

158 **Network (CNEReg)**

159 After demonstrating that active-RSNCEs may often function as enhancers and hence  
160 have significant impacts on morphological evolution [21], we next developed  
161 CNEReg as an evolutionary Conserved Non-coding Element interpretation method.  
162 The method works by modeling the paired gene expression and chromatin  
163 accessibility data during rumen and esophagus development and consolidating them  
164 into a GRN. A GRN helps to understand in detail the process of TF binding to  
165 active-RSCNEs, and how this leads to the cell type specific activation of RSEGs  
166 during different stages of development. CNEReg takes as input a set of paired  
167 time-series gene expression and chromatin accessibility data, ruminant comparative  
168 genomes, and comparative transcriptomes, and outputs the projected developmental  
169 regulatory network of the active-RSCNEs. The three major steps of CNEReg includes:  
170 multi-omics data integration, model component identification, and developmental  
171 regulatory network inference (Fig. 3A; Methods). The developmental regulatory  
172 network reconstruction is illustrated in the following sections.

173

174 **Identifying toolkit transcription factors**

175 We proposed toolkit transcription factors (TTFs) as the core concept of CNEReg and  
176 developed a computational pipeline to discover the developmental genetic toolkit TFs  
177 in evo-devo which may controls development, pattern formulation, and identity of  
178 body parts (details in Methods). We first separated 37 TFs from 619 non-TF target

179 genes (TGs) in 656 RSEGs. Those 37 TFs are further filtered by a more stringent  
180 expression specificity *JMS* score and are required to have nearby active-RSCNEs in  
181 the upstream or downstream 1 Mbp to TSS (Methods). Finally, 18 TTFs are defined  
182 (Additional file 1: Table S5) and their expression profile phylogeny well recovers the  
183 tissue lineages system (Fig. 4A). Rumen was clustered the closest to reticulum,  
184 omasum, and esophagus and then skin and other keratin tissues, which is consistent  
185 with the basic stratified epithelium shared in rumen with skin. These 18 TTFs also  
186 well represented rumen's major functions associated with other tissue systems,  
187 including gastrointestinal system, integumentary system, reproductive system,  
188 muscular system, nervous system, and endocrine system (Fig. 4B).

189 We observed that rumen recruited TTFs from multiple tissues to drive gene  
190 expression and expressed more TTFs from gastrointestinal system than other systems.  
191 For example, paired box protein 9 (PAX9) is a known key transcription factor during  
192 esophagus differentiation, which may play an important role in rumen's origin from  
193 the esophagus [22]. The homeobox family TFs HOXC8 and HOXC4, together with  
194 PITX1 are key developmental regulator for specific positional identities on the  
195 anterior-posterior axis [23, 24]. The other four TTFs, OVOL1, SOX21, TFAP2A,  
196 TP63 are from integumentary system and serve as master regulators in the regulation  
197 of epithelial development and differentiation [25-28].

198 We classified 18 TTFs into two types according to their dynamic gene expression  
199 pattern during rumen development. PITX1, BARX2, SOX2, GRHL1, GRHL3,  
200 TFAP2A, OTX1, DMRT2, and TWIST2 are early development TTFs showing the

201 highest expression at E60 or D1 (Fig. 4C). In contrast, PAX9, TP63, HOXC4, SOX21,  
202 HOXC8, OVOL1, PPARG, POU2F3, and TEAD4 are late development TTFs and  
203 highly expressed at D7, D28, or Y1 (Fig. 4C). We further associated those TTFs with  
204 6 cell types by their expression level in skin organoids scRNA-seq data [29]. The  
205 organoid culture system presents a complex skin organ model by reprogramming  
206 pluripotent stem cells. For example, TFAP2A is specifically expressed in epithelial  
207 cells (Fig. 4C).

208

### 209 **Constructing TTFs' upstream and downstream regulations**

210 To explore how TTFs are regulated and recruited, we scanned the active-RSCNEs  
211 near TTFs for the sequence-specific TF's motif binding, retained those TFs correlating  
212 well with TTFs (Spearman's correlation coefficient  $> 0.6$  across RNA-seq samples),  
213 and fitted a linear regression model integrating our paired expression and chromatin  
214 accessibility data to reveal 18 TTFs' upstream regulators (Fig 3B; Methods). The  
215 resulting TTFs' upstream regulatory network (Fig. 4D) identified 39 active-RSCNEs  
216 (15 Type I and 24 Type II) bound by 113TFs for 18 TTFs (Additional file 1: Table S6).  
217 GRHL1, an important regulator in keratin expression [30], is regulated by 31 TFs via  
218 6 active-RSCNEs, suggesting its potential roles in rumen development.

219 To explore 18 TTFs' regulatory roles, we first scanned 1,440 active-RSCNEs  
220 located 1 Mbp upstream or downstream around 512 RSEGs (FPKM  $> 1$  in at least one  
221 development stage) by HOMER [31] for binding sites of the 18 rumen TTFs. Then  
222 linear regression model quantitatively associated the accessibility of active-RSCNEs

223 with the expression of TTFs and RSEGs (Fig. 3B; Methods). The resulting TTFs'  
224 downstream regulatory network linked 139 active-RSCNEs (26 Type I and 113 Type  
225 II) with 17 TTFs and 93 RSEGs (Fig. 5A; Additional file 1: Table S7). RSEGs were  
226 categorized into different tissue systems. The gastrointestinal and integumentary  
227 systems both have 28 RSEGs which are functionally enriched in hair/molting cycle  
228 process (Fisher's exact test, adjusted- $P$  value =  $1.50 \times 10^{-2}$ ) and regulation of  
229 antimicrobial peptide production (Fisher's exact test, adjusted- $P$  value =  $3.58 \times 10^{-6}$ ).  
230 This is consistent with our previous finding that rumen evolved several important  
231 antibacterial functions specifically managing the microbiome composition [2].  
232 *SLC14A1* gene was specifically highly expressed in the rumen and hypothesized to be  
233 recruited from the urinary system (Fig. 5A). CNEReg identified four active-RSCNEs  
234 bound by three TTFs, OTX1, PPARG, and SOX21, to regulate *SLC14A1* (Fig. 5B).  
235 CNEReg designed a functional influence score by integrating regulation and  
236 conservation in evolution (Fig 3B; Methods) and ranked the active-RSCNEs in TTF's  
237 upstream and downstream networks (Additional file 2: Fig. S4, 5; Additional file 1:  
238 Tables S6, 7). Then we selected top 10 active-RSCNEs for enhancer activity detection  
239 in sheep fibroblasts *in vitro*. 9 of 10 showed significantly higher luciferase  
240 transcriptional activation compared to the pGL3-Promoter control (t-test,  $P$  value <  
241 0.05) (Additional file 2: Fig. S6). Collectively, CNEReg provides high quality  
242 developmental regulatory network to study rumen evolution.

243

244 **Regulatory sub-network underlying rumen and the esophagus divergence**

245 We previously hypothesized that the anatomical predecessor of the rumen is the  
246 esophagus based on their similar expression profile compared to other 49 tissues [5, 7].  
247 It is therefore of interest to identify the gene regulatory network underlying the  
248 differentiation between rumen and esophagus. We first identified differentially  
249 expressed genes (4, 258, 577 and 2,372, for E60, D1, D7, and Y1 in Additional file 2:  
250 Fig. S7A) and differentially accessible regions (9,436, 10,004, 3,984, 3,566 and 26 for  
251 E60, D1, D7, D28, and Y1 in Additional file 2: Fig. S7B) between rumen and  
252 esophagus at each developmental stage. Then, we identified six TTFs (PPARG,  
253 SOX21, TP63, OTX1, SOX2, and HOXC8) showing both significant differences in  
254 expression and in motifs enriched within the rumen OCRs (Fig. 6A; Methods).  
255 HOXC8 shows the largest difference at the earliest developmental stage, both in  
256 expression level and motif enrichment, and SOX21, SOX2, OTX1 and PPARG show  
257 similar trends. TP63 differentiates from D7 where the gene expression level and motif  
258 enrichment decline quickly in esophagus but not in rumen.

259 We extracted the six differential TTFs from the TTFs downstream regulatory  
260 network to form a regulatory sub-network which also including 24 differentially  
261 expressed RSEGs and 38 active-RSCNEs (Fig. 6B; Additional file 1: Table S8). The  
262 24 differentially expressed RSEGs were classified into gastrointestinal, integumentary,  
263 reproductive, nervous, muscular, immune, and urinary systems and 10 of 24 non-TF  
264 RSEGs were classified into integumentary system. Seven non-TF RSEGs (*KRT17*,  
265 *KRT36*, *LOC101118712*, *ATP6VIC2*, *KLK10*, *SPINK9*, and *IRX*) were regulated by  
266 SOX21. Previous study revealed that SOX21 could determine the fate of ectodermal

267 organ and control the epithelial differentiation [28]. We observed that SOX21 binds to  
268 “Chr11:40325877-150” to regulate the expression of KRT17, KRT36 and  
269 LOC101118712. The functional influence of “Chr11:40325877-150” is ranked at the  
270 top of all Type II active-RSCNEs in the differentially regulatory sub-network  
271 (Additional file 1: Table S8). Those RSEGs were enriched in epidermis development,  
272 formation of anatomical boundary, and urea transmembrane transport biological  
273 process (Additional file 1: Table S9), which are consistent with the function difference  
274 between rumen and esophagus. The 38 active-RSCNEs may imply the potential  
275 genetic basis of rumen’s origin and evolution from esophagus.

276

277 **Transposable element may rewire gene regulatory network through**  
278 **active-RSCNEs**

279 After interpreting active-RSCNEs as important regulators for TTFs and RSEGs in  
280 rumen development, we next address the genomic origin of the active-RSCNEs.  
281 Transposable elements (TE) are known to constitute a high proportion of  
282 taxonomy-specific CNEs, play a central role in rewiring gene regulatory networks,  
283 and to facilitate novel or rapid evolution of ecologically relevant traits [32, 33]. Hence,  
284 we estimated which active-RSCNEs may derive from TEs. Among 39 and 139  
285 active-RSCNEs in TTF’s upstream and downstream networks, we identified six  
286 (15.38%) and 12 (8.6%) TEs, respectively. This gives a 1.8-fold enrichment of TEs in  
287 active-RSCNEs associated with TTFs relative to non-TTF RSEGs. At the gene level,  
288 six of 18 TTFs (33.33%) and 12 of 93 RSEGs (12.90%) are regulated by TE via

289 active-RSCNEs. This gives a 2.58-fold enrichment. As a background, there are 85  
290 TEs around all 656 RSEGs (+/- 200 kbp) and give an average 13%. Together, our data  
291 suggests that TE may recruit expression of TTFs and rewiring the regulatory network  
292 to give rise of trait novelties.

293

## 294 **Discussion**

295 The evolution of new trait is driven by several types of genetic reprogramming,  
296 including mutations in protein-coding genes and post-transcriptional mechanisms,  
297 transformation of regulatory elements such as promoters and enhancers, and  
298 recruitment of gene expression from other organs [34, 35]. Mutations in non-coding  
299 regulatory regions are believed to selectively perturb target gene expression in  
300 specific tissue context and thereby circumvent any pleiotropic effects from  
301 protein-coding mutations [36]. Recent advances in comparative genomics, along with  
302 the increased availability of whole genome sequences, have led to the identification of  
303 many conserved non-coding elements (CNEs), which are assumed to have regulatory  
304 functions [1, 6, 37]. Therefore, the time is ripe for an analytical framework to  
305 investigate the regulatory role of such CNEs.

306 Here we propose a model of gene expression recruitment by CNEs. Our results  
307 show how CNEs can regulate gene expression as either *trans*-regulatory elements  
308 (TTF in our study) or *cis*-regulatory elements (active-RSCNEs) of target genes  
309 (RSEGs). CNEReg provides a framework to integrate comparative genomics,  
310 comparative transcriptomic, and multi-omics data to interpret CNEs by GRN. On one



311 hand, GRN presents the global picture how rumen recruits gene expression from other  
312 tissues by activating RSCNEs to achieve many traits. On the other hand, GRN  
313 identifies TTFs and active-RSCNEs as hypotheses, which need to be pursued by in  
314 *vitro* and *in vivo* functional studies. Our method for systematically interpreting  
315 conserved *cis*-regulatory sequence in non-coding region by integrating developmental  
316 multi-omics data will have broad interest in other applications. For example, the  
317 Zoonomia Project describes a whole-genome alignment of 240 species comprising  
318 representatives from more than 80% of mammalian families [38]. The Bird 10,000  
319 Genomes (B10K) Project provides comparative genome dataset for 363 genomes  
320 from 92.4% of bird families [39]. Recently ~6.9 million CNEs from many vertebrate  
321 genomes are collected into dbCNS and await to be interpreted [40].

322 Our work is limited in several aspects. CNEReg infers the gene regulation as the  
323 interaction of TFs with accessible DNA regions in development and relies on the  
324 correlation of gene expression and chromatin accessibility across samples. Much  
325 deeper understanding can be revealed by CHIP-seq data and 3D chromatin interaction  
326 data to provide physical enhancer promoter interactions. In addition, time course  
327 regulatory analysis on the omics data measured at shorter and closer developmental  
328 stages will help [12]. Furthermore, developmental samples are known as a  
329 heterogeneous mixture of many cell types and it will be fruitful to infer the GRNs of  
330 the underlying cell types based on scATAC-seq and scRNA-seq data [10].

331

332 **Conclusions**

333 In conclusion, CNEReg is demonstrated as a systematic approach to understand the  
334 large-scale maps of CNEs by modeling omics data over development for its act on  
335 gene regulation. We see the potential that CNEReg can be generalized to understand  
336 the complex traits or the origin and evolution of vertebrate organs with multi-omics  
337 data generated in proper time and space. Our method allows evo-devo thinking in how  
338 gene regulation could evolve and shape animal evolution.

339 **Methods**

340 **CNEReg infers developmental regulatory network to interpret conserved**

341 **non-coding element**

342 CNEReg aims to systematically fill the gap between conserved non-coding elements  
343 (CNEs) and its significantly impacted morphology in evolution. This is done by  
344 reconstructing a developmental regulatory network by paired time series of paired  
345 gene expression and chromatin accessibility data. Particularly in sheep CNEs are  
346 RSCNEs and morphology is the innovation of rumen organ, which is further denoted  
347 by the set of rumen specific genes RSEGs. We reconstruct gene regulatory network  
348 during rumen development to systematically understand how the TFs regulate genes  
349 via batteries of RSCNEs, which over development, lead to the cell type specific  
350 activation of RSEGs.

351 The main idea of CNEReg is to focus on those toolkit TFs as major players in  
352 evo-devo to study how those TFs are regulated by RSCNEs and how they utilize  
353 RSCNEs to regulate RSEGs. CNEReg models the expression of target genes (TG)  
354 conditional on chromatin accessibility of RSCNEs and expression of transcription  
355 factors (TF). CNEReg is composed by three steps as shown in Fig. 3 and uses three  
356 formulations to model, (1) expression of toolkit TFs, (2) expression of RSEGs, (3)  
357 functional influence of RSCNEs (Fig. 3; Table 1).

358

359 **Step 1. Modeling expression of toolkit transcription factors (TTFs)**

360 We first identify toolkit TFs by its nearby evolutionally conserved cis-regulatory

361 element in genome, expression pattern across tissues, expression levels in  
362 developmental stages. TTFs should satisfy four conditions: (1) TFs should be rumen  
363 specifically expressed genes (37 TFs in the 656 RSEGs), (2) there should be  
364 active-RSCNEs around TFs (+/- 1M bp, 35 TFs remains), (3) TFs should be expressed  
365 (FPKM > 1) in at least one time point during rumen development (30 TFs remains),  
366 and (4) these TFs should be additional tissue specificity. TFs were ranked by our  
367 tissue specificity score *JMS* and only the TFs for top 50 specificity in at least one  
368 tissue will be selected (18 TFs remains). Finally, 18 TFs were identified as TTFs and  
369 listed in **Supplementary text**). These TFs played a leading role in rumen  
370 development (Additional file 1: Table S5) and served as the main component to  
371 construct the rumen developmental regulatory network.

372 Next, we model how the TTFs are regulated from paired gene expression and  
373 chromatin accessibility data, i.e., to reconstruct the upstream regulatory network of  
374 TTFs. We established a linear regression model as follows to explore the upstream  
375 regulatory network of the 18 TTFs (Schematic illustration in **Fig. 3** and mathematical  
376 notations in **Table 1**).

$$377 \quad TTF_l = \beta_{l,0} + \sum_{i \in I_l} \beta_{l,i} \left( \sum_{m \in MB_i} TF_m \right) O_i + \varepsilon_l, \quad \varepsilon_l \sim N(0, \sigma_l^2)$$

378 where  $TTF_l$  is the expression of the  $l$ -th TTF;  $MB_i$  is the set of TFs with significant  
379 motif match in the  $i$ -th active-RSCNE;  $TF_m$  is the expression of the  $m$ -th candidate  
380 TF with binding motif to regulate the  $l$ -th TTF. The Spearman correlation coefficient  
381 between  $TF_m$  and  $TTF_l$  is greater than 0.6 (FDR  $q$ -value < 0.01) to ensure the  
382 potential regulatory relationship;  $O_i$  represents the chromatin accessibility score of

383 the  $i$ -th active-RSCNE within 2 Mbps around the  $l$ -th TTF.  $\beta$  is the parameter to be  
384 estimated. If  $\beta_{l,i}$  is statistically significant in the regression analysis, the  $i$ -th  
385 active-RSCNE and its TFs in  $MB_i$  will be contained in the upstream regulatory  
386 network of the  $l$ -th TTF.

387

### 388 **Step 2. Modeling expression of rumen specifically expressed genes (RSEGs)**

389 We model how the RSEGs are regulated by TTFs and its active-RSCNE from paired  
390 gene expression and chromatin accessibility data, i.e., to reconstruct the downstream  
391 network regulated by TTFs. We established the linear regression model as follows  
392 (Schematic illustration in **Fig. 3** and mathematical notations in **Table 1**).

$$393 \quad RSEG_n = \gamma_{l,n,0} + \gamma_{l,n,k} (TTF_l \cdot O_k)^{\frac{1}{2}} + \varepsilon_n, \quad \varepsilon_n \sim N(0, \sigma_n^2)$$

394 where  $TTF_l$  is the expression of the  $l$ -th TTF;  $O_k$  represents the chromatin  
395 accessibility score of the  $k$ -th active-RSCNE with binding sites of the  $l$ -th TTF;  
396  $RSEG_n$  is the expression of the  $n$ -th RSEG with the  $k$ -th active-RSCNE around within  
397 2 Mbps. In practice, we determine the downstream regulation relationship with  
398 Spearman correlation that can eliminate the outlier values to simplify the calculation.

399 When the Spearman correlation coefficient  $\gamma_{l,n,k}$  between  $RSEG_n$  and  $(TTF_l \cdot$   
400  $O_k)^{\frac{1}{2}}$  is greater than 0.7 (FDR  $q$ -value  $< 0.01$ ), the  $n$ -th RSEG is likely to be  
401 regulated by the  $l$ -th TTF through binding on the  $k$ -th active-RSCNE. The extracted  
402 TTF, active-RSCNEs, and RSEGs triplets are the TTF's downstream regulatory  
403 network.

### 404 **Step 3. Quantifying functional influence of active-RSCNEs**

405 We finally quantify the functional influence of active-RSCNEs, rank the  
406 active-RSCNEs, and select the top active-RSCNEs as experimental candidates. This  
407 task can be done by integrate the RSCNE's conservation score in evolution with its  
408 regulatory potential in the developmental regulatory network.

409 We firstly collected conservation scores of active-RSCNEs from comparative  
410 genomics study [5]. RSCNEs were classified into two types by their conservation  
411 patters across species. Type I RSCNEs had no outgroup sequence aligned and Type II  
412 RSCNEs had orthologous sequences in one or more outgroups but were only  
413 conserved in ruminant. For the  $k$ -th active-RSCNE, the conservation score  $C_k$  was  
414 calculated by PhastCons score (Type I) or PhyloP score (Type II).

415 We then estimated the regulatory strength of active-RSCNEs in the upstream and  
416 downstream regulatory network of TTFs. An active-RSCNE played a regulatory role  
417 in the regulatory network if four conditions were satisfied: (1) this active-RSCNE  
418 should be a chromatin accessible peak, (2) TTFs should bind on this active-RSCNE,  
419 (3) RSEGs regulated by this active-RSCNE with TTFs binding should be expressed,  
420 and (4) the expression of binding TTFs and the accessibility of this active-RSCNE  
421 should be correlated with the expression of regulated RSEGs. By combining these  
422 four factors, we defined the regulatory strength  $R_{k,t}$  of the  $k$ -th active-RSCNE at  
423 time point  $t$  in the regulatory network as follows:

$$R_{k,t} = \sum_{l,n} (O_{k,t} \cdot B_{k,l} \cdot \sqrt{TTF_{l,t} \cdot RSEG_{n,t}} \cdot 2^{Y_{l,n,k}})$$

424 Where,  $O_{k,t}$  is the chromatin accessibility score of the  $k$ -th active-RSCNE at time

425 point  $t$  in rumen;  $B_{k,l}$  is the motif binding strength of the  $l$ -th TTF on the  $k$ -th  
426 active-RSCNE (computed by HOMER);  $TTF_{l,t}$  is the expression of the  $l$ -th TTF at  
427 time point  $t$  in rumen;  $RSEG_{n,t}$  is the expression of the  $n$ -th RSEG at time point  $t$   
428 in rumen;  $\gamma_{l,n,k}$  is the Spearman correlation coefficient between  $RSEG_n$  and  
429  $(TTF_l \cdot O_k)^{\frac{1}{2}}$  from the regulatory network. Then the regulatory strength  $R_k$  of the  
430  $k$ -th active-RSCNE was defined as the maximum value across all time points in  
431 rumen samples:

$$R_k = \max_t R_{k,t}$$

432 The regulatory strength  $R_k$  is from the multi-omics data in development and  
433 conservation score  $C_k$  is from multi-genome data across species. The two measures  
434 are respectively at regulation level and genome sequence level and can be naturally  
435 assumed independent to each other. In addition, we found that the regulatory strength  
436 and the conservation score were quite complementary to each other (Additional file 2:  
437 Fig. S4, 5) for active-RSCNEs. Hence, we defined the functional influence  $W_k$  of the  
438  $k$ -th active-RSCNE as the geometric mean of the regulatory strength  $R_k$  and the  
439 conservation score  $C_k$  as follows:

$$W_k = \sqrt{R_k \cdot C_k}$$

440 This functional influence score allows us to prioritize active-RSCNEs by importance  
441 in rumen innovation.

442

#### 443 **Hierarchical clustering and principal component analysis (PCA)**

444 We performed hierarchical clustering on the gene expression and peak chromatin

445 accessibility profiles in 14 rumen samples at five time points (E60/D1/D7/D28/Y1).  
446 Heatmap was plotted by R package “pheatmap” with “correlation” as distance  
447 measure and “complete” as clustering method. Then we performed dimensional  
448 reduction by principal component analysis (PCA) with R function “prcomp”. The  
449 gene expression and chromatin accessibility value were log transformed as  
450  $\log_2(\text{FPKM} + 1)$  and  $\log_2(\text{Openness} + 1)$  as input. FPKM is the reads per kilobase  
451 per million mapped reads and openness score was calculated for each peak under each  
452 condition as the fold change of reads number per base pair [10]. The first two  
453 principal components are shown in **Fig. 1D and E**.

454

#### 455 **Definition of tissue specificity score**

456 Specificity illustrates the property that gene are functional in one particular biological  
457 context compared to other contexts. For our transcriptomics data across 50 tissues in  
458 sheep, genes highly expressed in only one or several tissues but not expressed in other  
459 tissues were defined as tissue specific. Our gene expression matrix is with 23,126  
460 rows (the number of expressed genes) and 830 columns (the number of samples  
461 sequenced in 50 sheep tissues, and each tissue has several biological replicates)  
462 (Additional file 1: Table S10).

463 To quantify the tissue specificity, we proposed a JMS score for a gene in certain  
464 tissue to combine gene expression level with a Jensen–Shannon Divergence (*JSD*)  
465 value as follows.



$$JMS = \frac{\sqrt[3]{med(G)}}{JSD}$$

466 where  $med(G)$  represents gene's median expression in a certain tissue.  $\sqrt[3]{med(G)}$   
467 can guarantee that the numerator and denominator are on the same magnitude.  $JSD$  is  
468 the Jensen–Shannon divergence to evaluate the gene's expression specificity  
469 introduced in [41]. It adopts an entropy-based measure to assess the similarity  
470 between two probability distributions in statistics as follows,

$$JSD(P||Q) = \frac{1}{2} \left( \sum_{k=1}^n x_k \log \frac{2x_k}{x_k + y_k} + \sum_{k=1}^n y_k \log \frac{2y_k}{x_k + y_k} \right)$$

471 Where  $P = (x_1, x_2, \dots, x_n)$  and  $Q = (y_1, y_2, \dots, y_n)$  are two probability distributions  
472 constructed from our gene expression values across tissues.  $n$  is the number of  
473 samples. Given each row of our gene expression matrix, we then normalized the  
474 gene's expression vector, i.e., each element in this vector was divided by the sum of  
475 all elements. For a given gene,  $Q = (y_1, y_2, \dots, y_n)$  is its corresponding normalized  
476 row vector. Given the tissue we are interested,  $P = (x_1, x_2, \dots, x_n)$  is constructed as a  
477 control vector whose components are  $\frac{1}{m}$  in the given tissue with  $m$  replicates and 0  
478 in other tissues. Finally, the  $JSD$  will be calculated as the divergence between  $P$  and  $Q$   
479 for a certain gene in certain tissue. The smaller the  $JSD$  value, the more specific this  
480 gene in this tissue.

481 In summary,  $JSD$  provided a relative specificity score by a nonlinear measure  
482 of divergence. We further extended it by emphasizing significantly highly expressed  
483 genes in certain tissues to enhancing specificity. This JMS score allows us to better  
484 explore the toolkit transcription factors' expression patterns and recruitment of genes

485 based on tissue specificity.

486

#### 487 **Differential regulatory network construction between rumen and esophagus**

488 We constructed differential regulatory network between rumen and esophagus by

489 extracting differential RSEGs, differential TTFs, and active-RSCNEs associated

490 sub-network from the regulatory network of TTFs. The differential RSEGs and

491 differential TTFs are defined as follows.

#### 492 *Differential RSEGs between rumen and esophagus.*

493 We used R packages “limma” and “edgeR” to extract differential genes at four

494 developmental time points (E60/D1/D7/D28) with thresholds  $FDR < 0.05$  and

495  $\log_2FC > 1$  (FC was fold-change of FPKM in rumen relative to esophagus). It was

496 noted that at time point Y1, we only had one biological replicate for RNA-seq data in

497 rumen and esophagus separately and we could not perform F-test on these two

498 samples. Instead, we identified genes with  $FPKM > 2$  in rumen and  $FC > 2$  as

499 differential genes. Then we combined differential genes at five time points to get

500 differential genes set between rumen and esophagus. Differential RSEGs between

501 rumen and esophagus were intersection of differential genes set and RSEGs set in

502 regulatory network of TTFs.

#### 503 *Differentially accessible peaks between rumen and esophagus.*

504 We implemented R packages “limma” and “edgeR” to get differentially accessible

505 peaks between rumen and esophagus at five developmental time points

506 (E60/D1/D7/D28/Y1) with thresholds  $FDR < 0.05$  and  $|\log_2FC| > 1$  (FC was

507 fold-change of chromatin accessibility score in rumen relative to esophagus).

508 *Differential TTFs between rumen and esophagus.*

509 We first collected 1,027 TFs of sheep from animalTFDB3.0

510 (<http://bioinfo.life.hust.edu.cn/AnimalTFDB/#/>). The 15,835 expressed genes in

511 rumen and esophagus were intersected with these 1,027 TFs to obtain 768 TFs for the

512 following analysis. We used HOMER to find TFs' binding on the differentially

513 accessible peaks with threshold  $-\log_{10}pvalue > 6$  at each time point. Then we used

514 R packages "limma" and "edgeR" to get differentially expressed TFs at four time

515 points (E60/D1/D7/D28) with threshold  $FDR < 0.05$  and  $\log_2FC > 1$ . We identified

516 differentially expressed TFs at time point Y1 with threshold  $FPKM > 2$  in rumen and

517  $FC > 2$ . Differential TFs set was defined as the intersection of TFs binding on

518 differentially accessible peaks and differentially expressed TFs. Differential TTFs

519 between rumen and esophagus were intersection of differential TFs set and TTFs set

520 in regulatory network of TTFs.

521

## 522 **Collecting samples for ATAC-seq and RNA-seq**

523 We collected a total of 37 samples of the rumen, esophagus epithelium tissues and liver

524 tissues from 14 Hu sheep including 5 time points (embryo 60-day, 1-day, 7-day, 28-day,

525 and 1-year) from XiLaiYuan ecological agriculture co. LTD in Taizhou city (Jiangsu,

526 China). All samples rinsed with PBS and were soaked in cold 1×PBS added with

527 penicillin-streptomycin. All animals were slaughtered under the guidelines of

528 Northwest A&F University Animal Care Committee.

529

530 **ATAC-seq library preparation, sequencing, and analysis**

531 *Isolation of ruminal and esophageal epithelial cells.*

532 A piece of ruminal epithelial tissue was removed from PBS buffer (pH 7.4), placed on a  
533 watch glass, and brushed with sterile D-Hanks in all directions. The clipped tissue  
534 (approximately 500 mg) was placed in a small beaker and rinsed 2-3 times with a  
535 D-Hanks (pH 7.4) solution (4 times antibody, pre-warmed in a 37 °C water bath). Next,  
536 0.25% trypsin (15 ml) was pre-warmed in a 37 °C water bath and added to a conical  
537 flask with the rumen epithelium sample, which was then digested in a 37 °C water bath  
538 for 30 min while shaking well every 5 min. The ruminal epithelial tissue was removed  
539 and the trypsin digestion solution was discarded. This step was repeated three times  
540 until the epithelium felt sticky. The treated epithelial tissue was then placed in a sterile  
541 beaker and rinsed three times with D-Hanks solution, and this step was repeated using a  
542 fresh beaker. Ten milliliters of trypsin were added, and the mixture was digested in a  
543 37 °C water bath for 10-20 min until the cells detached. Cells from the first 3-4  
544 detachments were not collected because these are generally necrotic or granular cells.  
545 Only the last two digested cell types (spinous and basal cells) were generally collected,  
546 after the cells in the digested sample were observed under a microscope. The cells were  
547 filtered through a cell strainer and added to a 10 ml centrifuge tube containing a drop of  
548 calf serum. The above digestion and collection steps were repeated 3 times. The  
549 digestate was collected following centrifugation at 1500 r/min for 5-10 min, and the  
550 supernatant was discarded. One milliliter of Dulbecco's Modified Eagle Medium

551 (DMEM) solution was added to the precipitate, and the mixture shaken or blown to  
552 adjust the cell density to  $10^6$  cells/ml. Trypan blue was added to verify that cell viability  
553 reached 95%. The esophageal epithelial cells were obtained with the same pipeline with  
554 the ruminal epithelial cells as above.

#### 555 *Preparation of nuclei*

556 To prepare nuclei, we spun 50,000 cells at 500 xg for 5 min and then washed the pellet  
557 using 50  $\mu$ l of cold 1 $\times$  PBS. The solution was then centrifuged at 500 xg for 5 min, and  
558 the cells were lysed using cold lysis buffer (10 mM Tris-HCl, pH 7.4, 10 mM NaCl, 3  
559 mM MgCl<sub>2</sub> and 0.1 NP40). Immediately after lysis, the nuclei were spun at 500 xg for  
560 10 min using a refrigerated centrifuge. To avoid losing cells during the nucleus  
561 preparation, we used a fixed angle centrifuge and carefully pipetted away from the  
562 pellet after centrifugation.

#### 563 *Transposition and purification*

564 The pellet was immediately resuspended in transposase reaction mix (17.5  $\mu$ l of DEPC  
565 H<sub>2</sub>O, 5  $\mu$ l of TTBL buffer, 2.5  $\mu$ l of TTE mix buffer and all the nuclear DNA). The  
566 transposition reaction was carried out for 10 min at 55 °C in metal bath, and the sample  
567 was immediately purified using a Qiagen MinElute kit.

#### 568 *Library construction*

569 PCR was performed to amplify the library for 14 cycles using the following PCR  
570 conditions: 72 °C for 3 min, 98 °C for 30 s, and thermocycling at 98 °C for 15 s, 60 °C  
571 for 30 s and 72 °C for 3 min.

#### 572 *Data quality control and short-read alignment*

573 Sequencing reads must undergo quality control and adapter trimming to optimize the  
574 alignment process. FastQC (version 0.11.5) [42] was used to assess overall quality.  
575 Reads were trimmed for quality as well as the presence of adapter sequences using the  
576 Trim Galore Wrapper script [43] with default parameters. Raw ATAC-seq reads of  
577 sheep were mapped to the sheep reference genome (NCBI assembly Oar\_v4.0) using  
578 Bowtie2 (version 2.2.8) [44] with default parameters. Duplicated reads were removed  
579 using the default parameters in Picard (version 2.1.1). Reads mapping to mitochondrial  
580 DNA were excluded from the analysis together with low-quality reads (MAPQ < 20).

#### 581 *Open accessible peak calling*

582 Accessible regions and peaks were identified using MACS [45] with parameters “-q  
583 0.05 -shift 37 -extsize 73” for narrow peaks. The centers of identified peaks were used  
584 to define peak overlaps with genomic features according to the following criteria. If a  
585 center site was located in the promoter of a gene (2 kbp upstream from the transcription  
586 start site (TSS)), or the gene body, the peaks would be assigned to that gene. Distal  
587 intergenic regions refer to regions > 3 kbp from the TSS and > 1 kbp from the  
588 transcription termination site (TTS).

#### 589 *Consensus peaks analysis*

590 Open accessible peaks were identified in four biological replicates of each tissue by  
591 using “bedtools intersect”, and consensus peaks with openness values of each peak in  
592 each sample were built by merging these regions and calculated with R package  
593 “Diffbind” (version 2.10.0) [46].

#### 594 *Peak annotation*

595 Peak annotation was performed using R packages “GenomicFeatures”, “ChIPseeker”,  
596 and “AnnotationHub”.

597

### 598 **RNA-seq library preparation and sequencing**

599 We prepared directional RNA-seq libraries from the cells of the same samples as used  
600 for ATAC-seq. Each sample was added 1ml Trizol protocol (Invitrogen, USA), and  
601 frozen in -80 °C until utilization.

#### 602 *RNA isolation, library construction, and sequencing*

603 In all tissue samples collected for this study, total RNA was isolated from a frozen  
604 sample according to the Trizol protocol (Invitrogen, USA), using 1.5 µg RNA per  
605 sample as the input material for sample preparation. Sequencing libraries were  
606 generated using a NEBNext® Ultra RNA Library Prep Kit for Illumina® (NEB, USA)  
607 according to the manufacturer’s recommendations, and index codes were added to  
608 attribute sequences to samples. Briefly, mRNA was purified from total RNA using  
609 poly-T oligo-attached magnetic beads and fragmented using divalent cations at  
610 elevated temperature in NEB Next First-Strand Synthesis Reaction Buffer (5X).  
611 First-strand cDNA was synthesized using random hexamer primers and M-MuLV  
612 Reverse Transcriptase (RNase H). Second-strand cDNA was subsequently  
613 synthesized using DNA Polymerase I and RNase H. Remaining overhangs were  
614 converted into blunt ends by exonuclease/polymerase activity. After adenylation of 3’  
615 ends of DNA fragments, NEB Next Adaptors with hairpin loop structures were  
616 ligated to prepare for hybridization. To select cDNA fragments with appropriate

617 lengths, the library fragments were purified with an AMPure XP system (Beckman  
618 Coulter, Beverly, USA). Then 3  $\mu$ l of USER Enzyme buffer (NEB, USA) was  
619 incubated with size-selected, adaptor-ligated cDNA at 37 °C for 15 min followed by 5  
620 min at 95 °C before PCR amplification, using Phusion High-Fidelity DNA  
621 polymerase, Universal PCR primers, and Index (X) Primer. Finally, PCR products  
622 were purified using the AMPure XP system, and library quality was assessed using an  
623 Agilent Bioanalyzer 2100 system. The index-coded samples were clustered with a  
624 cBot Cluster Generation System using a HiSeq 4000 PE Cluster Kit (Illumina)  
625 according to the manufacturer's instructions. After cluster generation, the library  
626 preparations were sequenced on an Illumina Hiseq X Ten platform, and 150 bp  
627 paired-end reads were generated. All these sequencing procedures were performed by  
628 Novogene Technology Co., Ltd., Beijing, China.

#### 629 *RNA-seq data quality control and quantification processing*

630 We obtained high-quality reads by removing adaptor sequences and filtering  
631 low-quality reads from raw reads using Trimmomatic (version 0.36) [47] with the  
632 following parameters: LEADING:3 TRAILING:3 SLIDINGWINDOW:4:15  
633 MINLEN:40. High-quality reads were all aligned to the NCBI assembly Oar\_v4.0  
634 reference sheep genome [48]. For this, we used STAR (Version 2.5.1) [49] with the  
635 following parameters: outFilterMultimapNmax 1, outFilterIntronMotifs  
636 RemoveNoncanonical Unannotated, outFilterMismatchNmax 10, outSAMstrandField  
637 intronMotif, outSJfilterReads Unique, outSAMtype BAM Unsorted,  
638 outReadsUnmapped Fastx, and outFileNamePrefix. The unmapped reads were



639 extracted by SAMtools (Version 1.3) [50] for further mapping by HISAT2 (Version  
640 2.0.3-beta) [51]. We computed Fragments Per Kilobase per Million mapped reads  
641 (FPKM) values for the genes in each sample using StringTie (Version1.3.4) [52].

642 As the samples were prepared and sequenced in three known distinct batches  
643 (see Additional file 1: Table S1), we used the *removeBatchEffect()* function from R  
644 *limma* package to build a linear model with the batch information and the cell types  
645 on log<sub>2</sub>-transformed FPKM+1, and we regressed out the batch variable.

#### 646 *Cell lines and cell culture.*

647 Conspecific cell lines can be used to validate the regulatory activity of RSCNEs. For  
648 example, mouse NHI3T3 fibroblast cells were used to validate the enhancer activity  
649 in mouse of one CNE which showed an ability of regulating the loss and  
650 re-emergence of legs in snakes [53]. Hence, we selected fibroblast cells of ruminants  
651 for *in vitro* regulatory activity experiments. Sheep and goat fibroblast cells were  
652 provided by Guangxi University and were cultured in Dulbecco's Modified Eagle  
653 Medium (DMEM) containing 10% FBS (Gibco, Grand Island, NY, USA). All cell lines  
654 used in this study were maintained in the specified medium supplemented with 1 ×  
655 Penicillin–Streptomycin (Gibco) and incubated in 5% CO<sub>2</sub> at 37 °C.

#### 656 *Cloning and luciferase assays.*

657 All the reporter constructs were cloned into pGL-3 promoter plasmids (Promega,  
658 Madison, WI, USA). Fragments of the candidate RSCNEs were cloned into  
659 pGL3-promoter vector digested by *BamH* I and *Sal* I downstream of the luciferase  
660 gene. All constructs were confirmed by sequencing. Transfection of all reporter

661 plasmids constructs was performed using TurboFect (R0531, Thermo Scientific,  
662 Waltham, USA). Renilla Luciferase pRL-TK-Rluc (Promega) served as a transfection  
663 control, and luciferase expression was subsequently monitored with the dual luciferase  
664 assay (Promega) 24 h after transfection. Each luciferase assay was monitored at least  
665 five times, independently.

#### 666 *Statistics*

667 The t-test in the GraphPad Prism7.0 software (Prism, San Diego, CA, USA) was  
668 applied to calculate the significance for the regulatory activity. Differences were  
669 statistically significant when  $p$  value  $< 0.05$ .

670

#### 671 **Supplementary Information**

672 **Additional file 1: Table S1.** Statistic of 37 ATAC-seq data used in this study. **Table**  
673 **S2.** Statistic of RNA-seq data used in our study. **Table S3.** 1,601 active-RSCNEs.  
674 **Table S4.** 1,061 active-RSCNEs are enriched for binding motifs of transcriptional  
675 regulators known to play vital role in rumen development (128 motifs with Benjamini  
676  $q$ -value  $< 1.00 \times 10^{-3}$ ). **Table S5.** 18 rumen toolkit TFs (TTFs). **Table S6.** Upstream  
677 regulatory network of 18 rumen toolkit TFs. **Table S7.** Downstream regulatory  
678 network of 18 rumen toolkit TFs. **Table S8.** Differential regulatory sub-network  
679 between rumen and esophagus. **Table S9.** GO enrichment analysis of 52 TGs in the  
680 differential regulatory sub-network between rumen and esophagus. BP denotes  
681 Biological Process, MF denotes Molecular Function, and CC denotes Cellular  
682 Component. **Table S10.** The gene expression profile of 655 rumen specifically

683 expressed genes (RSEGs) which showed by FKPM value.

684 **Additional file 2: Fig. S1.** Data quality check for the ATAC-seq samples by their  
685 sequence depth, fragment distribution, and QC score. **Fig. S2.** Paired expression and  
686 chromatin accessibility time series data reveals the regulatory landscape for rumen  
687 and esophagus development. **Fig. S3.** Further characterization of active-RSCNEs. **Fig.**  
688 **S4.** Relationships between the regulatory strength and the conservation score of TTF  
689 upstream network. **Fig. S5.** Relationships between the regulatory strength and the  
690 conservation score of TTF downstream network. **Fig. S6.** Luciferase activity assays of  
691 10 active-RSCNEs with top functional influence score. **Fig. S7.** Differentially  
692 expressed genes and differentially accessible peaks between rumen and esophagus at  
693 each stage.

694

#### 695 **Declarations**

#### 696 **Acknowledgments**

697 We thank High-Performance Computing (HPC) of Northwest A&F University  
698 (NWFU) for providing computing resources.

699

#### 700 **Authors' contributions**

701 Y.W, H.W, Y.J. and W.W. conceived the project and designed the research. X.P., Z.M,  
702 and X.S. performed the majority of analysis with contributions from Y.C., C.Z.; X.P.  
703 and T.Z. prepared rumen and esophagus epithelium cells and hepatocyte for ATAC-seq  
704 and RNA-seq. H.L. performed the luciferase reporter assay. X.P., Y.W., R.H., Z.M, and

705 X.S. drafted the manuscript. All authors wrote, revised, and contributed to the final  
706 manuscript.

707

### 708 **Funding**

709 This work was supported the National Natural Science Foundation of China (NSFC)  
710 under Grants Nos. 12025107, 11871463, 11688101,61621003, the National Thousand  
711 Youth Talents Plan, the National Key Research and Development Program of China  
712 (2020YFA0712402), and CAS "Light of West China" Program (No.  
713 xbzg-zdsys-201913).

714

### 715 **Availability of data and materials**

716 The raw reads for all RNA-seq data, the ATAC-seq data from the ruminal and  
717 esophageal epithelial cells and hepatocyte have been deposited at the Sequence Read  
718 Archive (SRA) under project number PRJNA485657. The customized scripts have  
719 deposited in GitHub (<https://github.com/xiangyupan/CNEReg>).

720

### 721 **Ethics approval and consent to participate**

722 All implemented experiments were approved by the Institutional Animal Care and  
723 Use Committee and were in strict accordance with good animal practices as defined  
724 by the Northwest A&F University (protocol number: NWAFA1008). All efforts  
725 were made to minimize animal suffering.

726

727 **Competing interests**

728 The authors declare no competing interests.

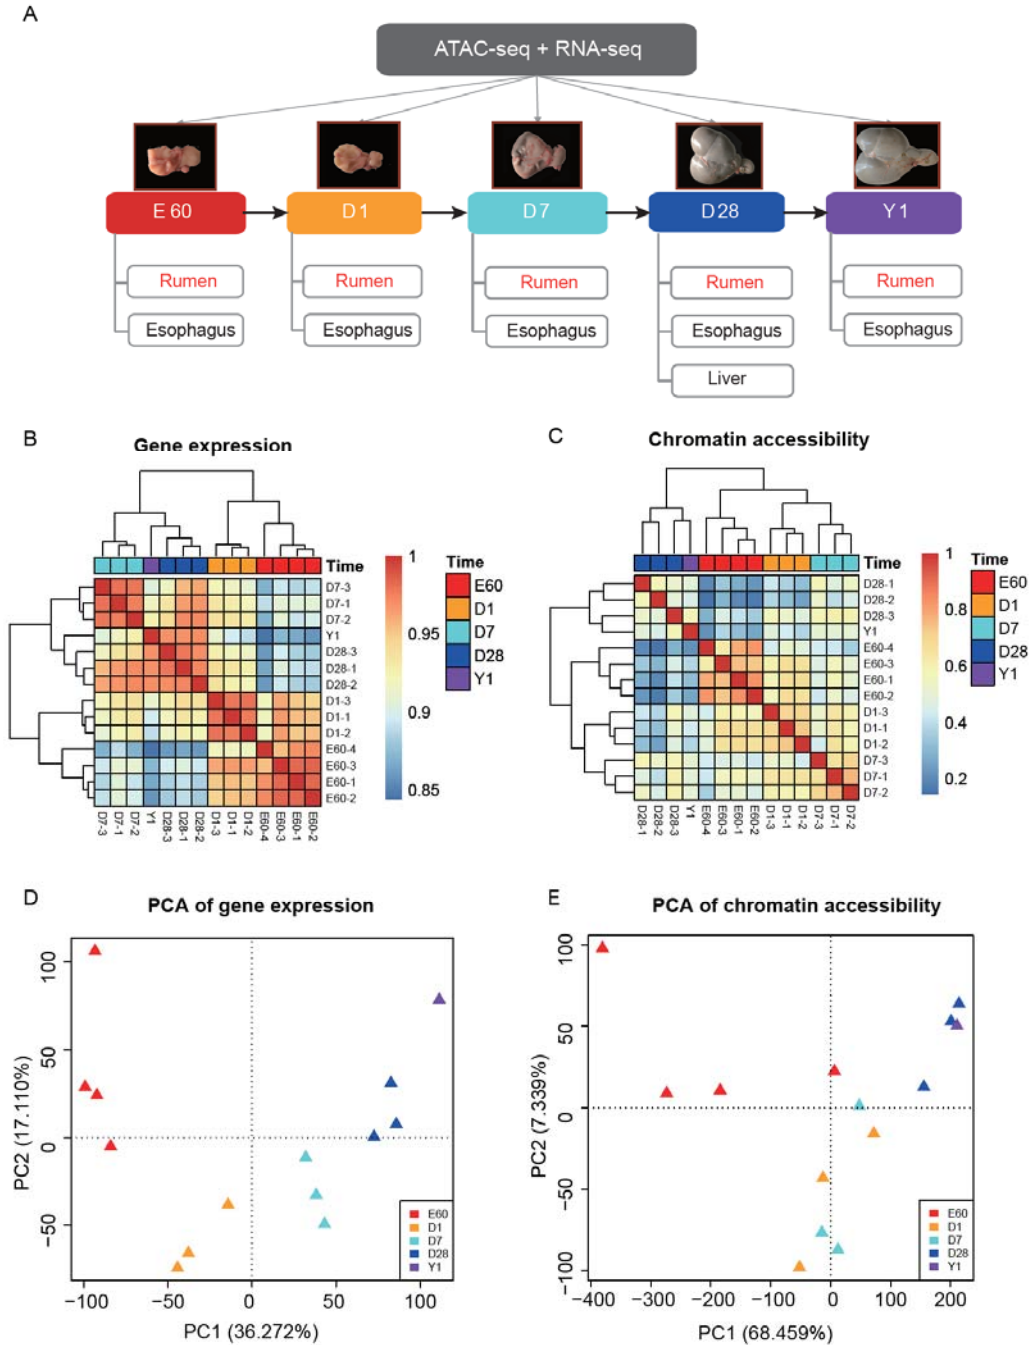

729

730 **Fig. 1. Paired expression and chromatin accessibility time series data reveals**  
 731 **regulatory landscape for rumen development. (A)** Experimental design diagram for  
 732 multi-replicate, multi-tissue, and multi-level omics data profiling during sheep  
 733 development from embryo 60-day (E60), postnatal day 1, 7, 28(D1, D7, and D28) to

734 adult 1-year (Y1). **(B, C)** Hierarchical clustering of gene expression for 14,637 genes  
735 and chromatin accessibility for 178,651 open chromatin regions both indicate rumen's  
736 multi-stage development process. D28 and Y1 are more closely grouped and E60, D1,  
737 and D7 are distinct group both in expression and chromatin accessibility. **(D, E)**  
738 Unsupervised principal component analysis of rumen's gene expression and  
739 chromatin accessibility. Multi-stage development pattern is consistent with clustering  
740 results. Early development stages E60 and D1 show larger replicate variation than D7,  
741 D28, and Y1 at both chromatin accessibility and gene expression. In addition,  
742 chromatin accessibility shows more smoothed trajectory than expression.

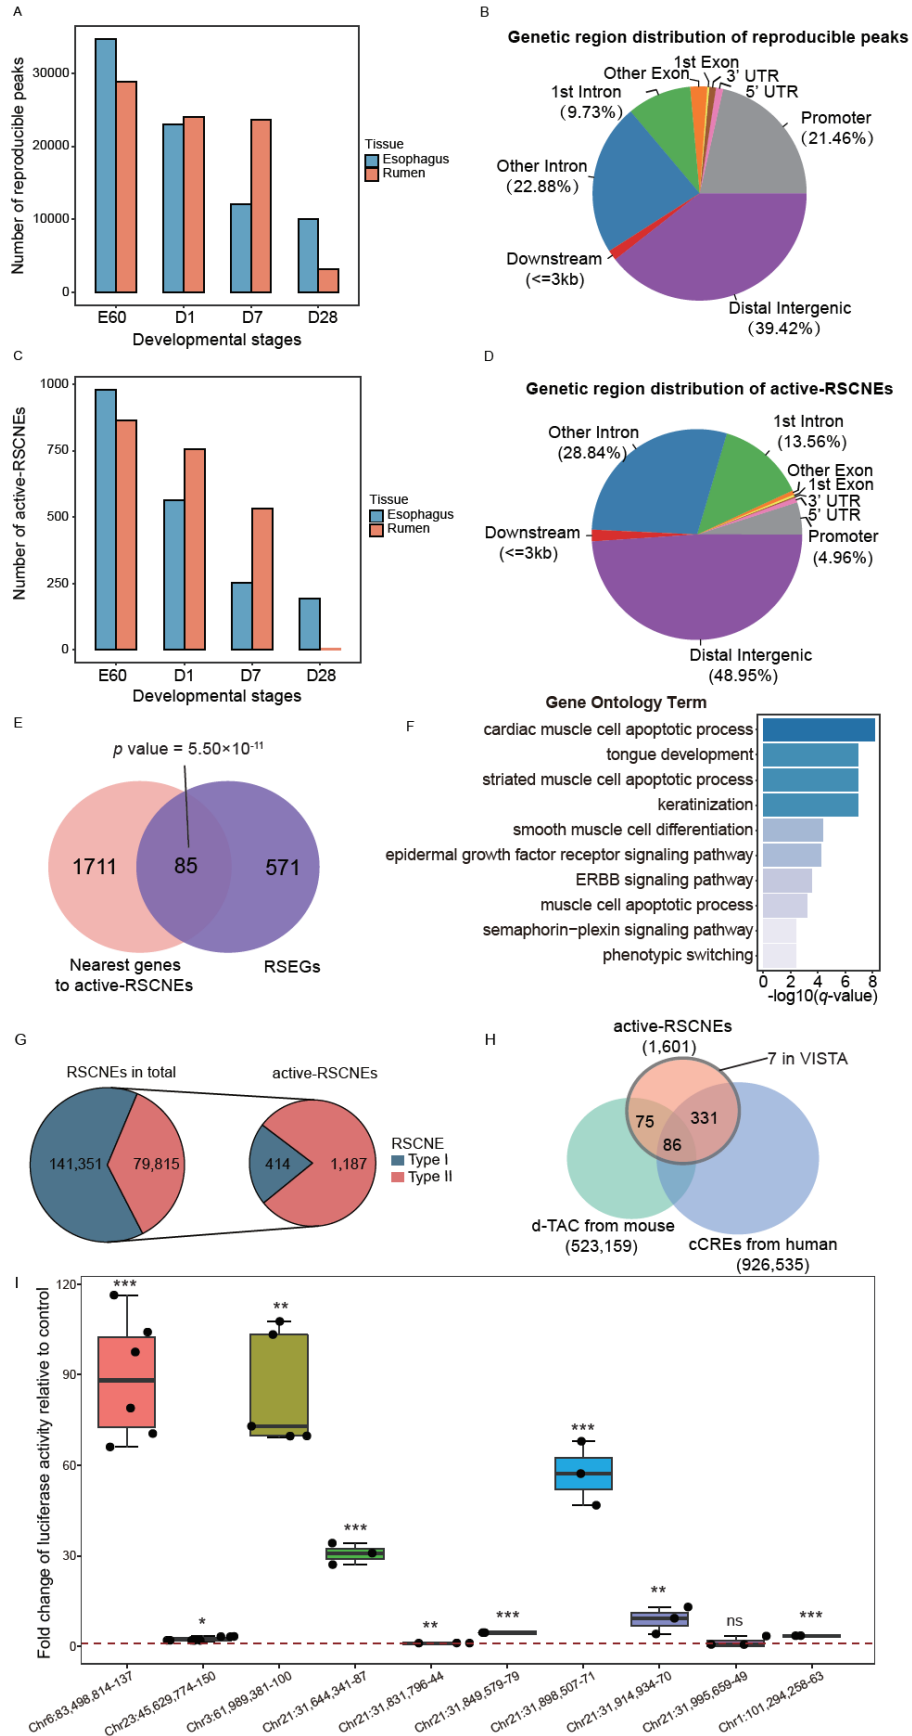



744 **Fig. 2. Characterization of active-RSCNEs.** (A) The number of reproducible peaks  
745 during each developmental stage in rumen and esophagus. (B) Annotating  
746 reproducible peaks by location in different genomic regions. (C) The number of  
747 active-RSCNEs during each developmental stage in rumen and esophagus. (D)  
748 Annotating active-RSCNEs by location in different genomic regions. (E) GO  
749 enrichment analysis for genes near the active -RSCNEs. (F) The genes nearest to  
750 active-RSCNEs are enriched in RSEGs. *p*-value is calculated by Fisher's exact test.  
751 (G) Illustration of the number of Type I and Type II in total RSCNEs and  
752 active-RSCNEs. (H) The intersections among active-RSCNEs with enhancers from  
753 d-TAC, cCREs, and VISTA datasets. (I) Luciferase activity assays of 10  
754 active-RSCNEs randomly chosen in 1,601 active-RSNCEs. 9 of 10 show regulatory  
755 activity in PGL-3 promoter.

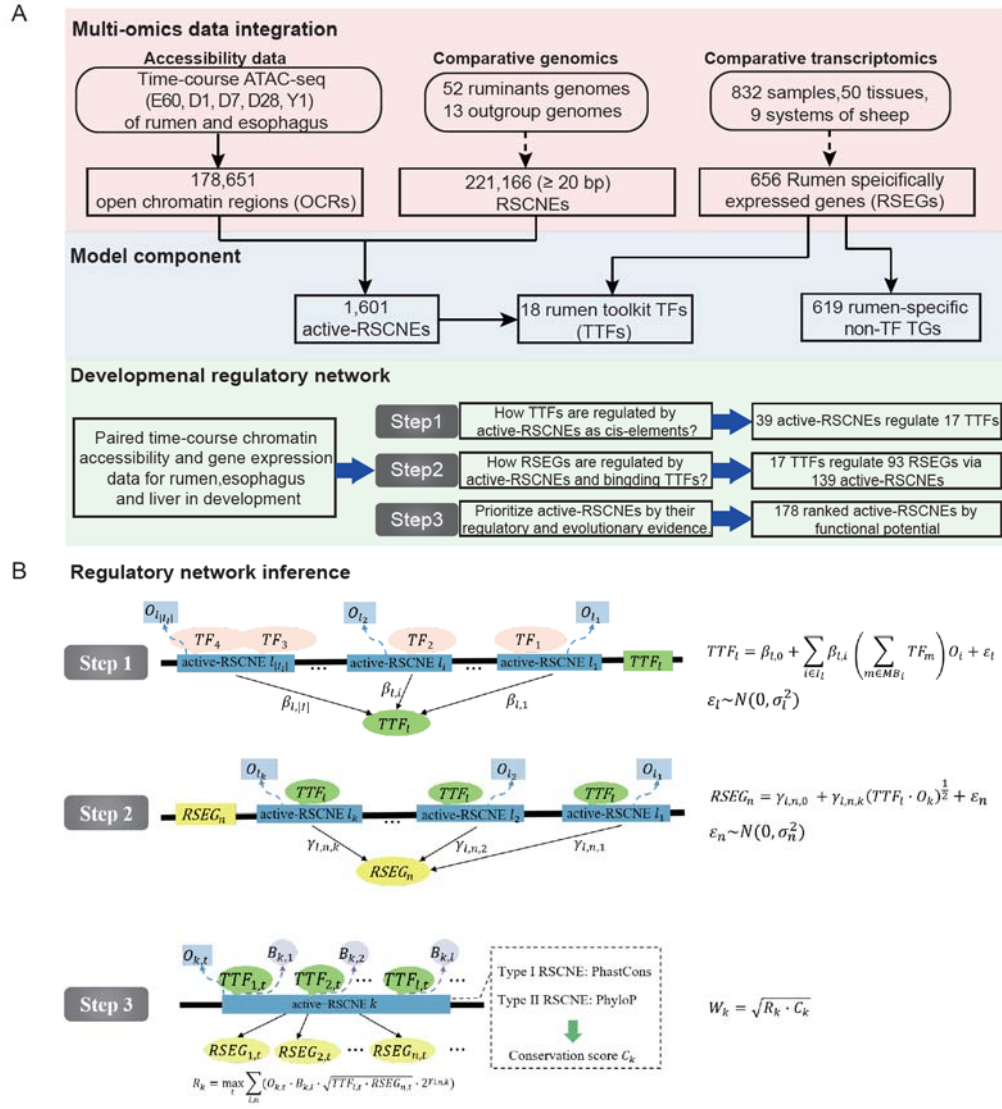

756

757 **Fig. 3. CNEReg interprets RSCNEs by reconstructing developmental regulatory**

758 **network.** (A) CNEReg inputs paired time-series gene expression & chromatin

759 accessibility data, ruminant comparative genomes, and comparative transcriptomes

760 and outputs the developmental regulatory network of active-RSCNEs. Three major

761 steps of CNEReg includes: multi-omics data integration, model component

762 identification, and developmental regulatory network inference. (B) The

763 developmental regulatory network reconstruction is further illustrated in three steps.

764 Step1: inferring the upstream regulations of rumen toolkit TFs (TTF). Step2: inferring  
765 the TTF's downstream regulation to target genes via active-RSCNEs. Step3: Deriving  
766 active-RSCNE's functional influence score by integrating regulatory strength in  
767 network and evolutionary conservation score. CNEReg's model component and  
768 notations are detailed in Table 1.

769 **Table 1. CNEReg model component and notations.**

| <b>Data and variables</b>               | <b>Notation</b>                                                                           | <b>Example</b>                                                  |
|-----------------------------------------|-------------------------------------------------------------------------------------------|-----------------------------------------------------------------|
| Expression of TTF                       | $TTF_{l,t}$ := expression of the $l$ -th TTF on $t$ -th time point                        | $TTF_{HOXC8} = 25.48$ on D7 in rumen                            |
| Expression of TF                        | $TF_m$ := expression of the $m$ -th TF                                                    | $TF_{JUN} = 1035.79$ on D7 in rumen                             |
| Expression of RSEG                      | $RSEG_{n,t}$ := expression of the $n$ -th RSEG on $t$ -th time point                      | $RSEG_{SLC14A1} = 42.34$ on D7 in rumen                         |
| Accessibility of active-RSCNE           | $O_{k,t}$ := openness of $k$ -th active-RSCNE on $t$ -th time point                       | $O_{Chr1:196579342-242} = 18.83$ on D7 in rumen                 |
| TFs with motif match in an active-RSCNE | $MB_i$ := set of TFs with significant motif match in $i$ -th active-RSCNE                 | HOXC8 has motif match at active-RSCNE<br>$Chr1:196579342 - 242$ |
| Motif matching strength of TF on RE     | $B_{i,l}$ := sum of $-\log(\text{p-value})$ of $l$ -th TF's motif on $i$ -th active-RSCNE | $B_{Chr1:196579342-242} = 4.28486$                              |



771 **Fig. 4. 18 rumen TTFs and its upstream regulations.** (A) Phylogeny of 50 tissues  
772 from sheep by 18 rumen TTFs' expression groups the samples well by different  
773 lineages and biological system. (B) 18 rumen TTFs' biological functions (marked by  
774 green) and the tissue with high expression (marked in blue). Tissues are grouped and  
775 colored by their lineages. (C) 18 rumen TTFs' expression values along the  
776 development stages. By their dynamic patterns, they can be grouped into early (cold  
777 colored) and late (warm colored). In addition, 18 rumen TTFs' expression in skin  
778 organoids scRNA-seq data are visualized by Uniform Manifold Approximation and  
779 Projection (UMAP) plot. The associated specific cell type names are labeled. (D)  
780 Rumen TTFs' upstream gene regulatory network shows the candidate TFs with  
781 statistical significance. Nodes are colored by early and late TTFs. Blue edges  
782 highlight the regulatory relationship among TTFs.

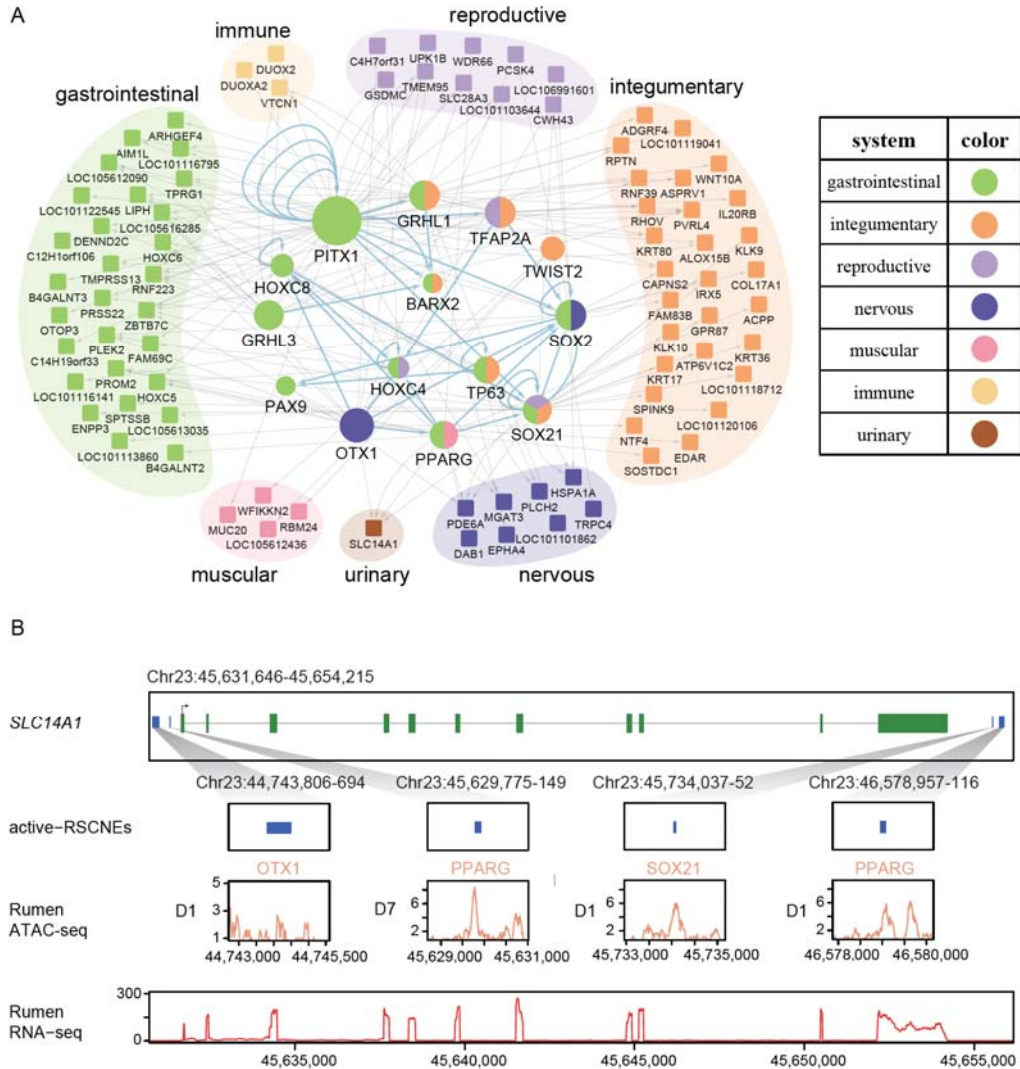

783

784 **Fig. 5. Rumen TTFs' downstream regulatory network.** (A) Rumen TTFs'

785 downstream regulatory network with 17 rumen TTFs regulating 93 TGs via 139

786 active-RSCNEs. TTFs are colored by the tissue they are highly expressed and TGs are

787 annotated and colored by their biological system. (B) An example from the regulatory

788 network shows that *SLC14A1* is regulated by four active-RSCNEs with TTFs' motif

789 occurrence. The expression and chromatin accessibility tracks are derived from rumen

790 ATAC-seq (D1 or D7) and RNA-seq data (Y1).

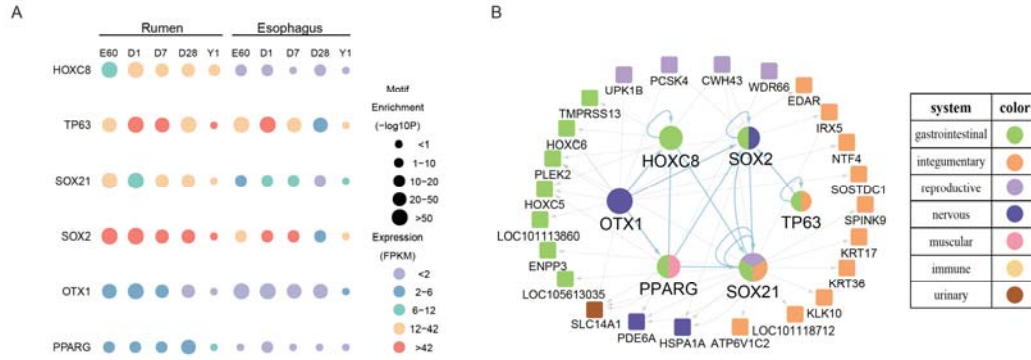

791

792 **Fig. 6. Regulatory network sheds lights on the difference between rumen and**

793 **esophagus in development. (A) Dynamics across stages for the 6 differential TTFs**

794 **between rumen and esophagus by integrating motif enrichment in differential**

795 **ATAC-seq peaks and gene expression level. (B) 6 differential rumen TTFs'**

796 **downstream regulatory subnetwork, which hypothesizes that rumen evolves from**

797 **homologous tissue esophagus by functional innovation through recruiting OTX1,**

798 **SOX21, HOXC8, SOX2, TP63, PPARG and utilizing 16 active-RSCNEs to rewire**

799 **developmental regulations.**



800 **References**

- 801 1. Carroll SB. Evo-Devo and an Expanding Evolutionary Synthesis: A Genetic Theory of  
802 Morphological Evolution. *Cell*. 2008;134(1):25-36. <https://doi.org/10.1016/j.cell.2008.06.030>
- 803 2. Pan X, Cai Y, Li Z, Chen X, Heller R, Wang N, *et al.* Modes of genetic adaptations underlying  
804 functional innovations in the rumen. *Sci China Life Sci*. 2021;64(1):1-21.  
805 <https://doi.org/10.1007/s11427-020-1828-8>
- 806 3. Smith JJ, Timoshevskaya N, Ye C, Holt C, Keinath MC, Parker HJ, *et al.* The sea lamprey  
807 germline genome provides insights into programmed genome rearrangement and vertebrate  
808 evolution. *Nat Genet*. 2018;50(2):270-277. <https://doi.org/10.1038/s41588-017-0036-1>
- 809 4. Woolfe A, Goodson M, Goode DK, Snell P, McEwen GK, Vavouri T, *et al.* Highly conserved  
810 non-coding sequences are associated with vertebrate development. *Plos Biol*. 2005;3(1):e7.  
811 <https://doi.org/10.1371/journal.pbio.0030007>
- 812 5. Chen L, Qiu Q, Jiang Y, Wang K, Lin Z, Li Z, *et al.* Large-scale ruminant genome sequencing  
813 provides insights into their evolution and distinct traits. *Science*. 2019;364(6446):v6202.  
814 <https://doi.org/10.1126/science.aav6202>
- 815 6. Wray GA. The evolutionary significance of cis-regulatory mutations. *Nat Rev Genet*.  
816 2007;8(3):206-216. <https://doi.org/10.1038/nrg2063>
- 817 7. Xiang R, Oddy VH, Archibald AL, Vercoe PE, Dalrymple BP. Epithelial, metabolic and innate  
818 immunity transcriptomic signatures differentiating the rumen from other sheep and mammalian  
819 gastrointestinal tract tissues. *Peerj*. 2016;4:e1762. <https://doi.org/10.7717/peerj.1762>
- 820 8. McLean CY, Bristor D, Hiller M, Clarke SL, Schaar BT, Lowe CB, *et al.* GREAT improves  
821 functional interpretation of cis-regulatory regions. *Nat Biotechnol*. 2010;28(5):495-501.  
822 <https://doi.org/10.1038/nbt.1630>
- 823 9. Long HK, Osterwalder M, Welsh IC, Hansen K, Davies J, Liu YE, *et al.* Loss of Extreme  
824 Long-Range Enhancers in Human Neural Crest Drives a Craniofacial Disorder. *Cell Stem Cell*.  
825 2020;27(5):765-783. <https://doi.org/10.1016/j.stem.2020.09.001>
- 826 10. Duren Z, Chen X, Jiang R, Wang Y, Wong WH. Modeling gene regulation from paired  
827 expression and chromatin accessibility data. *Proc Natl Acad Sci U S A*.  
828 2017;114(25):E4914-E4923. <https://doi.org/10.1073/pnas.1704553114>
- 829 11. Li L, Wang Y, Torkelson JL, Shankar G, Pattison JM, Zhen HH, *et al.* TFAP2C- and  
830 p63-Dependent Networks Sequentially Rearrange Chromatin Landscapes to Drive Human  
831 Epidermal Lineage Commitment. *Cell Stem Cell*. 2019;24(2):271-284.  
832 <https://doi.org/10.1016/j.stem.2018.12.012>
- 833 12. Duren Z, Chen X, Xin J, Wang Y, Wong WH. Time course regulatory analysis based on paired  
834 expression and chromatin accessibility data. *Genome Res*. 2020;30(4):622-634.  
835 <https://doi.org/10.1101/gr.257063.119>
- 836 13. Xin J, Zhang H, He Y, Duren Z, Bai C, Chen L, *et al.* Chromatin accessibility landscape and  
837 regulatory network of high-altitude hypoxia adaptation. *Nat Commun*. 2020;11(1):4928.  
838 <https://doi.org/10.1038/s41467-020-18638-8>
- 839 14. Fath EM, Schwarz R, Ali AM. Micromorphological studies on the stomach of sheep during  
840 prenatal life. *Anat Histol Embryol*. 1983;12(2):139-153.  
841 <https://doi.org/10.1111/j.1439-0264.1983.tb01010.x>
- 842 15. Wardrop ID. Some preliminary observations on the histological development of the fore-stomachs  
843 of the lamb I. Histological changes due to age in the period from 46 days of foetal life to 77 days

- 844 of post-natal life. *The Journal of Agricultural Science*. 1961;3(57):335-341.  
845 <https://doi.org/10.1017/S0021859600049303>
- 846 16. Irie N, Kuratani S. The developmental hourglass model: a predictor of the basic body plan?  
847 *Development*. 2014;141(24):4649-4655. <https://doi.org/10.1242/dev.107318>
- 848 17. Cardoso-Moreira M, Halbert J, Vallotton D, Velten B, Chen C, Shao Y, *et al*. Gene expression  
849 across mammalian organ development. *Nature*. 2019;571(7766):505-509.  
850 <https://doi.org/10.1038/s41586-019-1338-5>
- 851 18. Gorkin DU, Barozzi I, Zhao Y, Zhang Y, Huang H, Lee AY, *et al*. An atlas of dynamic chromatin  
852 landscapes in mouse fetal development. *Nature*. 2020;583(7818):744-751.  
853 <https://doi.org/10.1038/s41586-020-2093-3>
- 854 19. Moore JE, Purcaro MJ, Pratt HE, Epstein CB, Shores N, Adrian J, *et al*. Expanded  
855 encyclopaedias of DNA elements in the human and mouse genomes. *Nature*.  
856 2020;583(7818):699-710. <https://doi.org/10.1038/s41586-020-2493-4>
- 857 20. Visel A, Minovitsky S, Dubchak I, Pennacchio LA. VISTA Enhancer Browser--a database of  
858 tissue-specific human enhancers. *Nucleic Acids Res*. 2007;35(Database issue):D88-D92.  
859 <https://doi.org/10.1093/nar/gkl822>
- 860 21. Onimaru K. The evolutionary origin of developmental enhancers in vertebrates: Insights from  
861 non-model species. *Dev Growth Differ*. 2020;62(5):326-333. <https://doi.org/10.1111/dgd.12662>
- 862 22. Jonker L, Kist R, Aw A, Wappler I, Peters H. Pax9 is required for filiform papilla development  
863 and suppresses skin-specific differentiation of the mammalian tongue epithelium. *Mech Dev*.  
864 2004;121(11):1313-1322. <https://doi.org/10.1016/j.mod.2004.07.002>
- 865 23. Manak JR, Scott MP. A class act: conservation of homeodomain protein functions. *Dev Suppl*.  
866 1994:61-77.
- 867 24. Takeuchi JK, Koshiba-Takeuchi K, Matsumoto K, Vogel-Hopker A, Naitoh-Matsuo M, Ogura K,  
868 *et al*. Tbx5 and Tbx4 genes determine the wing/leg identity of limb buds. *Nature*.  
869 1999;398(6730):810-814. <https://doi.org/10.1038/19762>
- 870 25. Nair M, Teng A, Bilanchone V, Agrawal A, Li B, Dai X. Ovol1 regulates the growth arrest of  
871 embryonic epidermal progenitor cells and represses c-myc transcription. *J Cell Biol*.  
872 2006;173(2):253-264. <https://doi.org/10.1083/jcb.200508196>
- 873 26. Koster MI, Kim S, Mills AA, DeMayo FJ, Roop DR. p63 is the molecular switch for initiation of  
874 an epithelial stratification program. *Genes Dev*. 2004;18(2):126-131.  
875 <https://doi.org/10.1101/gad.1165104>
- 876 27. Leask A, Byrne C, Fuchs E. Transcription factor AP2 and its role in epidermal-specific gene  
877 expression. *Proc Natl Acad Sci U S A*. 1991;88(18):7948-7952.  
878 <https://doi.org/10.1073/pnas.88.18.7948>
- 879 28. Saito K, Michon F, Yamada A, Inuzuka H, Yamaguchi S, Fukumoto E, *et al*. Sox21 Regulates  
880 Anapc10 Expression and Determines the Fate of Ectodermal Organ. *iScience*. 2020;23(7):101329.  
881 <https://doi.org/10.1016/j.isci.2020.101329>
- 882 29. Lee J, Rabbani CC, Gao H, Steinhart MR, Woodruff BM, Pflum ZE, *et al*. Hair-bearing human  
883 skin generated entirely from pluripotent stem cells. *Nature*. 2020;582(7812):399-404.  
884 <https://doi.org/10.1038/s41586-020-2352-3>
- 885 30. Wilanowski T, Caddy J, Ting SB, Hislop NR, Cerruti L, Auden A, *et al*. Perturbed desmosomal  
886 cadherin expression in grainy head-like 1-null mice. *Embo J*. 2008;27(6):886-897.  
887 <https://doi.org/10.1038/emboj.2008.24>

- 888 31. Heinz S, Benner C, Spann N, Bertolino E, Lin YC, Laslo P, *et al.* Simple Combinations of  
889 Lineage-Determining Transcription Factors Prime cis-Regulatory Elements Required for  
890 Macrophage and B Cell Identities. *Mol Cell.* 2010;38(4):576-589.  
891 <https://doi.org/10.1016/j.molcel.2010.05.004>
- 892 32. Lynch VJ, Leclerc RD, May G, Wagner GP. Transposon-mediated rewiring of gene regulatory  
893 networks contributed to the evolution of pregnancy in mammals. *Nat Genet.*  
894 2011;43(11):1154-1159. <https://doi.org/10.1038/ng.917>
- 895 33. Ting CN, Rosenberg MP, Snow CM, Samuelson LC, Meisler MH. Endogenous retroviral  
896 sequences are required for tissue-specific expression of a human salivary amylase gene. *Genes*  
897 *Dev.* 1992;6(8):1457-1465. <https://doi.org/10.1101/gad.6.8.1457>
- 898 34. Gregory TR. The Evolution of Complex Organs. *Evolution: Education and Outreach.*  
899 2008;1(4):358-389. <https://doi.org/10.1007/s12052-008-0076-1>
- 900 35. Griffith OW, Wagner GP. The placenta as a model for understanding the origin and evolution of  
901 vertebrate organs. *Nat Ecol Evol.* 2017;1(4):72. <https://doi.org/10.1038/s41559-017-0072>
- 902 36. Lowe CB, Kellis M, Siepel A, Raney BJ, Clamp M, Salama SR, *et al.* Three periods of regulatory  
903 innovation during vertebrate evolution. *Science.* 2011;333(6045):1019-1024.  
904 <https://doi.org/10.1126/science.1202702>
- 905 37. Bejerano G, Pheasant M, Makunin I, Stephen S, Kent WJ, Mattick JS, *et al.* Ultraconserved  
906 elements in the human genome. *Science.* 2004;304(5675):1321-1325.  
907 <https://doi.org/10.1126/science.1098119>
- 908 38. Consortium Z. A comparative genomics multitool for scientific discovery and conservation.  
909 *Nature.* 2020;587(7833):240-245. <https://doi.org/10.1038/s41586-020-2876-6>
- 910 39. Feng S, Stiller J, Deng Y, Armstrong J, Fang Q, Reeve AH, *et al.* Dense sampling of bird  
911 diversity increases power of comparative genomics. *Nature.* 2020;587(7833):252-257.  
912 <https://doi.org/10.1038/s41586-020-2873-9>
- 913 40. Inoue J, Saitou N. dbCNS: A New Database for Conserved Noncoding Sequences. *Mol Biol Evol.*  
914 2021;38(4):1665-1676. <https://doi.org/10.1093/molbev/msaa296>
- 915 41. D'Alessio AC, Fan ZP, Wert KJ, Baranov P, Cohen MA, Saini JS, *et al.* A Systematic Approach  
916 to Identify Candidate Transcription Factors that Control Cell Identity. *Stem Cell Rep.*  
917 2015;5(5):763-775. <https://doi.org/10.1016/j.stemcr.2015.09.016>
- 918 42. Andrews S. FastQC: a quality control tool for high throughput sequence data. Babraham  
919 Bioinformatics, Cambridge, UK. 2016.
- 920 43. Krueger F. A wrapper tool around Cutadapt and FastQC to consistently apply quality and adapter  
921 trimming to FastQ files. Babraham Bioinformatics, Cambridge, UK. 2015.
- 922 44. Langmead B, Salzberg SL. Fast gapped-read alignment with Bowtie 2. *Nat Methods.*  
923 2012;9(4):357-359. <https://doi.org/10.1038/nmeth.1923>
- 924 45. Zhang Y, Liu T, Meyer CA, Eeckhoutte J, Johnson DS, Bernstein BE, *et al.* Model-based analysis  
925 of ChIP-Seq (MACS). *Genome Biol.* 2008;9(9):R137. <https://doi.org/10.1186/gb-2008-9-9-r137>
- 926 46. Stark R, Brown G. DiffBind: differential binding analysis of ChIP-Seq peak data. R package  
927 version. 2011.
- 928 47. Bolger AM, Lohse M, Usadel B. Trimmomatic: a flexible trimmer for Illumina sequence data.  
929 *Bioinformatics.* 2014;30(15):2114-2120. <https://doi.org/10.1093/bioinformatics/btu170>
- 930 48. Jiang Y, Xie M, Chen W, Talbot R, Maddox JF, Faraut T, *et al.* The sheep genome illuminates  
931 biology of the rumen and lipid metabolism. *Science.* 2014;344(6188):1168-1173.

- 932 <https://doi.org/10.1126/science.1252806>
- 933 49. Dobin A, Davis CA, Schlesinger F, Drenkow J, Zaleski C, Jha S, *et al.* STAR: ultrafast universal  
934 RNA-seq aligner. *Bioinformatics.* 2013;29(1):15-21.  
935 <https://doi.org/10.1093/bioinformatics/bts635>
- 936 50. Li H, Handsaker B, Wysoker A, Fennell T, Ruan J, Homer N, *et al.* The Sequence  
937 Alignment/Map format and SAMtools. *Bioinformatics.* 2009;25(16):2078-2079.  
938 <https://doi.org/10.1093/bioinformatics/btp352>
- 939 51. Kim D, Langmead B, Salzberg SL. HISAT: a fast spliced aligner with low memory requirements.  
940 *Nat Methods.* 2015;12(4):357-360. <https://doi.org/10.1038/nmeth.3317>
- 941 52. Pertea M, Kim D, Pertea GM, Leek JT, Salzberg SL. Transcript-level expression analysis of  
942 RNA-seq experiments with HISAT, StringTie and Ballgown. *Nat Protoc.* 2016;11(9):1650-1667.  
943 <https://doi.org/10.1038/nprot.2016.095>
- 944 53. Leal F, Cohn MJ. Loss and Re-emergence of Legs in Snakes by Modular Evolution of Sonic  
945 hedgehog and HOXD Enhancers. *Curr Biol.* 2016;26(21):2966-2973.  
946 <https://doi.org/10.1016/j.cub.2016.09.020>  
947
